# 1 Assessing the uptake and implementation of index testing among 2 adolescents and young people in Sub-Saharan Africa- a systematic 3 review

4  
5

6 Denise M. Sam<sup>1,2,5\*</sup>, Clare Bukirwa<sup>1,3</sup> Sintieh Ekongefeyin<sup>3,4</sup>

7

8 1 The Deanery of Molecular, Genetic and Population Health  
9 Sciences, Edinburgh Medical School, The University of  
10 Edinburgh, Old College, South Bridge, Edinburgh EH8 9YL, UK

11 2 Global Fund Unit, Plan International Canada

12 3 MUJHU Research collaboration, Uganda

13 4 Nuffield Department of Primary Care Health Sciences,  
14 University of Oxford, England, United Kingdom.

15 5 Sintieh Research Academy, Buea, Southwest Region  
16 Cameroon

17

18

19 \* [corresponding author](#); [samdenis454@gmail.com](mailto:samdenis454@gmail.com)

20

21 Two reviewers DS and CB conducted a search for published peer-reviewed journals as well as  
22 a search for grey literature.

23 ESN reviewed the final manuscript.

24

---

## Abstract

Adolescents and young people in Sub-Saharan Africa (SSA) face high mortality rates due to the Human Immunodeficiency Virus (HIV), highlighting the need for effective case identification strategies. The index testing strategy has shown promise, but its implementation and potential for use among this population remain poorly understood. We conducted a systematic review of the literature, searching multiple databases and repositories for studies conducted in SSA since 2010, involving individuals aged 10 to 24 years. Out of 1,448 studies initially identified, only three met the inclusion criteria. The implementation of the index testing strategy primarily involved recruiting index clients at healthcare facilities and testing points, followed by community-based testing. The involvement of community health workers and peer mentors proved valuable in achieving high yields. However, the legal age for consent poses a barrier to utilizing this strategy among adolescents and young people. By addressing barriers and improving facilitators, the index testing strategy holds great potential for effective case identification in this age group in SSA.

---

## Introduction

Over 75 million people are living with (Human Immunodeficiency Virus/ Acquired Immune Deficiency Syndrome (HIV/AIDS) globally, with a cumulative 32 million deaths [1]. With just over 12% of the global population, Sub-Saharan Africa (SSA) is home to about 71% of persons living with HIV, having ten countries accounting for 80% of cases with a prevalence of 3.6% [2,3]. This makes SSA the region with the highest HIV disease burden in the world. To address the problem of the HIV pandemic the Joint United Nations Programme on HIV/AIDS (UNAIDS) launched the 95-95-95 targets in 2014 (Heath, Levi, and Hill, 2021). The global goal of reaching 95-95-95 (95% of persons with HIV know their status, 95% of persons who know their status initiated on Antiretroviral Therapy (ART), and 95% viral suppression among persons on Antiretroviral drugs (ARV)) is key to ending AIDS as a public health crisis.

### **Public health impact of HIV testing among adolescents and young people in SSA**

Knowledge of an individual's HIV status has been proven to be essential for healthy living, be it a positive or negative HIV status [5]. HIV testing is the first step in HIV prevention for those who test negative as well as a gateway to lifesaving treatment for those who test HIV positive and preventing further spread of the virus. For adolescents and young people, HIV testing proves to be more beneficial. Persons within this age group face a higher risk of HIV infection due to their rapid physical, biological and structural changes [6]. Also, young people make up part of the key populations that

---

79 are disproportionately affected by HIV infection. This includes men who  
80 have sex with men (MSM), female sex workers (FSW) and injecting drug  
81 users (IDU) [7].

82  
83 In 2016, over 2.1 million adolescents were living with HIV with about 84% of  
84 them in SSA [8]. Out of the over 2.7 million children living with HIV in 2022,  
85 about 1.7 million of them were between the ages of 10-19 years [9]. By  
86 2017, about 3.9 million [2.1-5.7 million] adolescents and young people aged  
87 15-24 were living with HIV with slightly over three out of every four of them  
88 living in SSA [10]. Even though adolescents and young people are  
89 disproportionately affected by HIV infection, HIV testing which is primordial  
90 for HIV prevention as well as linkage to treatment is still very low with just  
91 about 20% of boys as well as 30% of girls between the ages 15-19 in Africa  
92 reported having been tested for HIV [11]. Low testing rates among these  
93 age groups imply late presentation to health facilities often with advanced  
94 disease symptoms which at times leads to poor clinical outcomes [12]. As  
95 such, HIV-related mortality has not changed over the years among  
96 adolescents as compared to other age groups [13]. Improving access to HIV  
97 testing among adolescents and young people.

98  
99 Achieving the 95-95-95 targets can only be successful if it can be achieved  
100 across the different subgroups. One of these is the adolescents and young  
101 people age group [14]. HIV testing is a key step in achieving HIV epidemic  
102 control, with strategies targeting this age group being a necessity.  
103 Adolescents as defined by the World Health Organization (WHO) are  
104 individuals between the ages of 10-19 years while youths are individuals

---

105 within the 15- 24-year age group. Young people cover the age range of 10-  
106 24 years (WHO, 2022). Out of the 1.8 billion young people in the world  
107 today, 90 per cent of them live in developing countries (Andrew Mason,  
108 2010). According to UNICEF (2020), young people (ages 10-24) accounted for  
109 over 410,000 (194,000-690,000) new HIV infections, among whom 150,000  
110 (44,000-310,000) were adolescents. Knowing that without treatment,  
111 adolescents and young people have a higher risk of dying, this age group,  
112 therefore, needs special attention as far as case identification and linkage  
113 to care are concerned [15]. One of the testing strategies, index testing is  
114 effective in reaching the first 95 targets [16].

115 Index testing which also can be referred to as partner testing/partner  
116 notification services is a testing strategy whereby contacts who have been  
117 exposed to HIV (i.e., sexually, by birth, or through sharing of needles)  
118 through contact with an HIV-positive person (considered the index client),  
119 are identified and offered HIV testing services [17]. The index testing  
120 strategy has been proven in several studies to be very effective in the  
121 identification of new HIV cases which is a necessary step in improving  
122 access to HIV care for those infected as well as HIV prevention for those  
123 tested negative [18-20]

124 Several strategies have been used over the last decade with varying efficacy  
125 to increase testing uptake among adolescents and young persons in SSA.  
126 Index testing is one of these strategies that has been proven to have one of  
127 the highest uptakes and yields in terms of positivity among those tested  
128 [21,22]. As a targeted testing strategy, it is also considered more cost-  
129 effective and sustainable compared to voluntary testing and counselling

---

130 strategies in terms of the number of tests carried out and the testing yield  
131 [23].

132 Noting its high efficiency in the identification of new HIV cases, the WHO  
133 recommends Index testing as one of the main testing strategies as part of a  
134 package of testing services, with adolescents being one of the target groups  
135 [24] According to the WHO, several countries have adopted and  
136 recommended the Index testing strategy, however, less than half of them  
137 show evidence of actually implementing the strategy [24]

138 This systematic review aims to identify barriers, facilitators, challenges,  
139 and opportunities in the implementation of index testing among adolescents  
140 and young people in SSA. The study seeks to improve the effectiveness of  
141 the strategy and bridge the testing gap in the region. The research  
142 questions are as follows:

- 143 1. How is index testing implemented among adolescents and young people in  
144 SSA?
- 145 2. What are the barriers and facilitators to index testing in this population?
- 146 3. What challenges and opportunities are associated with implementing the  
147 index testing strategy among adolescents and young people in SSA?

148

149

150

151

152

### 3. Methods

153

#### Study design

154

To answer the research questions, a systematic review was conducted. The choice of a systematic review instead of primary research stems from the need to provide a more comprehensive view of the subject. This will avoid a situation where only one particular country's experience in the region is considered. Secondly, the systematic review had the possibility of including primary studies carried out using different methodological approaches such as programmatic implementation and cross-sectional studies to answer the research question.

155

156

157

158

159

160

161

162

This systematic review was carried out following the Preferred Reporting Items for Systematic Reviews and Meta-Analyses (PRISMA) recommendations [25]. A systematic review proposal was written and submitted to the University of Edinburgh. This proposal was registered with Prospero (Registration number: **CRD42022362682**) to avoid any biased changes in methodology during the search process.

163

164

165

166

167

168

169

170

#### Ethical Considerations

171

To ensure that this study was ethical, an application to assess ethical integrity and risk was submitted to the Usher Masters Research Ethics Group (UMREG) of the University of Edinburgh. Data used in this review were publicly available data with no access to data which could identify the

172

173

174

175 participants in the primary studies. As such, there was no need for informed  
176 consent or parental consent. Following the completion of the Research  
177 Ethics Self-Evaluation and Review Form (RESERF), the study was considered  
178 as posing no reasonably foreseeable ethical risks and therefore considered  
179 to be ‘exempt’ without the need for further ethical review..

180

## 181 **Search Strategy**

182

183 To support the whole review process Covidence was used. Covidence  
184 (<http://www.covidence.org/>) is a web-based tool used for data screening  
185 and extraction and it is one of the tools recommended by the Cochrane  
186 collaboration [26]. The tool permits the use by multiple reviewers to  
187 simultaneously screen articles, carry out full text reads, customise and  
188 evaluate the quality of included papers as well as identify and remove  
189 duplicates.

190

191 The PICOS (Problem/Population, Intervention, Comparison Group,  
192 Outcome(s), and Setting), adapted from Syrene A. Miller, PICO Worksheet  
193 and Search Strategy National Center for Dental Hygiene Research [27]  
194 criteria as seen below was used to develop the search terms used. After  
195 discussing with colleagues, alternative terms were identified as seen in  
196 Table 1

197

## 198 **Grey literature**

199



200 The WHO institutional repository [28] as well as the repository for the  
201 International AIDS society [29] were searched for any articles, abstracts or  
202 papers that met the inclusion criteria. Secondly, the reviewers searched  
203 online for National strategic plans for HIV as well as guidelines for the  
204 management of HIV for countries in SSA. Any papers found were uploaded  
205 to Covidence for screening and full-text reading.  
206 Note that , any disagreements or differences were settled by ES Or have a  
207 third opinion.

208  
209  
210  
211  
212  
213  
214  
215  
216  
217

*Table 1; PICO (Problem/Population, Intervention, Comparison Group, Outcome(s), and Setting)*

| PICO               | Terms                                                      | Alternate terms                                                                   |
|--------------------|------------------------------------------------------------|-----------------------------------------------------------------------------------|
| Problem/Population | Adolescents (10-19 years) and<br>Young Adults (10-24years) | Adolescents/Young Adults<br>10-19, and 20-24years<br>Adolescents<br>Young persons |

---

|                     |                                                                               |                                                                                                          |
|---------------------|-------------------------------------------------------------------------------|----------------------------------------------------------------------------------------------------------|
| <b>Intervention</b> | Index testing (contact tracing, partner notification services) implementation | Index testing<br>Partner notification service<br>Contact tracing<br>Family testing<br>Index Case Testing |
| <b>Comparison</b>   | None                                                                          |                                                                                                          |
| <b>Outcomes</b>     | HIV testing uptake and Implementation                                         |                                                                                                          |
| <b>Setting</b>      | SSA                                                                           | West Africa, Central Africa, Eastern Africa, Southern Africa                                             |

218

219

220

221

222

223

224

225

226

S1 Tables show the search terms used. Three main electronic databases were searched systematically for peer review publications; PubMed, Cochrane Library and EMBASE. These databases were chosen given that together they contain a significant number of published articles [30,31]. Secondly, these databases contain publications that are relevant to answering the research questions.

227

### **Study Eligibility and selection**

228

229

230

231

The two reviewers independently screened through the search results and selected studies and articles that met the above eligibility criteria. The reviewers began by carrying out a preliminary title and abstract screening in the various databases. Studies that met the eligibility criteria were then

---

232 downloaded and saved in the reviewers' computers before being uploaded  
233 to Covidence.

234 After uploading all the articles into Covidence, duplicates were identified  
235 and removed. A second title and abstract screening were carried out by the  
236 two reviewers in Covidence followed by a full test review of the included  
237 articles to ensure they met the inclusion criteria.

238

### 239 **Quality Assessment**

240

241 To ensure that the studies included were of good quality, the Critical  
242 Appraisal Skills Programme (CASP) checklist was used [32]. This tool was  
243 selected because it is more commonly used in the quality appraisal of  
244 health-related qualitative research as well as its endorsement by the  
245 Cochrane Qualitative and Implementation Methods Group [33]. The data  
246 collection sheet in Covidence was customised as well as the quality  
247 appraisal forms. This permitted the reviewers to assess the quality of  
248 different study types included in the review. To avoid bias, two reviewers  
249 were independently involved in the assessment of the quality of the  
250 included studies. Any disagreement was resolved by ES.

251

252 In total, there were 13 questions in the customised assessment tool,  
253 however, not all studies were subjected to all 13 questions. For each  
254 question, the responses were, "YES", "NO", "UNCLEAR" and "NOT  
255 APPLICABLE". Given that the website (<https://casp-uk.net/faqs/>) did not  
256 recommend any particular score for the tool. However, it proposed a  
257 quality grading the studies as "poor", "moderate", and "high". We

---

258 therefore used this grading system to assess the various studies. Having a  
259 score of <50% was considered low quality, 50% to <100% as moderate quality  
260 while a score of 100% was considered high quality.

261

262

263

## 264 **Data Extraction**

265

266 The following data were extracted from the selected articles: the author  
267 and year of the study, where the study was carried out, study design,  
268 sample size and response rate, the testing strategy used in the study, the  
269 testing location as well as who was in charge of carrying out the test. The  
270 other information extracted from the studies included facilitators of uptake  
271 among index and contact persons, barriers to uptake among index and  
272 contact persons, challenges and opportunities of implementing index  
273 testing and finally, the strengths and limitations of the study.

274

## 275 **Data Analysis and synthesis**

276

277 A qualitative analysis and narrative synthesis were carried out with a focus  
278 on facilitators and barriers of the uptake among the index persons and the  
279 contact persons, the challenges and opportunities implementing the  
280 strategy as well as any percentage uptake and yield of the index testing.

281

282 Meta-analysis could not be carried out given the heterogeneity of the  
283 included articles. Articles and grey literature retrieved from databases  
284 were exported to Mendeley Reference Manager version 2.77.0.

285

286

287

288

289

290

## 4. Results

291

### Search Results

292

Following a search of the various databases, 1,451 studies were identified,  
293 including 1,343 studies from PubMed, 9 studies from Embase, 96 studies  
294 from the Cochrane database, and 3 studies from other sources. The initial  
295 screening of the 1,448 studies was done by this author, the primary  
296 reviewer. This was a review of the titles to ensure that they met the  
297 inclusion criteria. A total of 1,284 studies that did not meet the inclusion  
298 criteria were not selected. Following this exclusion, 167 studies were then  
299 selected and uploaded to Covidence which automatically identified 15  
300 duplicates which were removed.

301

At this stage, both reviewers were involved in the review process. Each  
302 reviewer screened titles and abstracts of 152 studies resulting in the  
303 exclusion of 122 studies. The primary reviewer identified studies without  
304 full text and searched the internet and the University library to get them.  
305 The full texts for 30 studies were uploaded to Covidence. The two  
306 reviewers then proceeded to assess for eligibility and quality, which led to

307 the exclusion of 27 studies with reasons noted. Fig 1 summarises the various  
308 steps in the review process.

309 The search for grey literature resulted in three abstracts from WHO  
310 institutional repository and the International AIDS Society conference  
311 abstract database that were included in the total studies identified  
312 (n=1,451). However, these studies did not meet the eligibility criteria for  
313 full-text read and so were not included in the final analysis. As such, all  
314 three included studies were peer-reviewed.

315

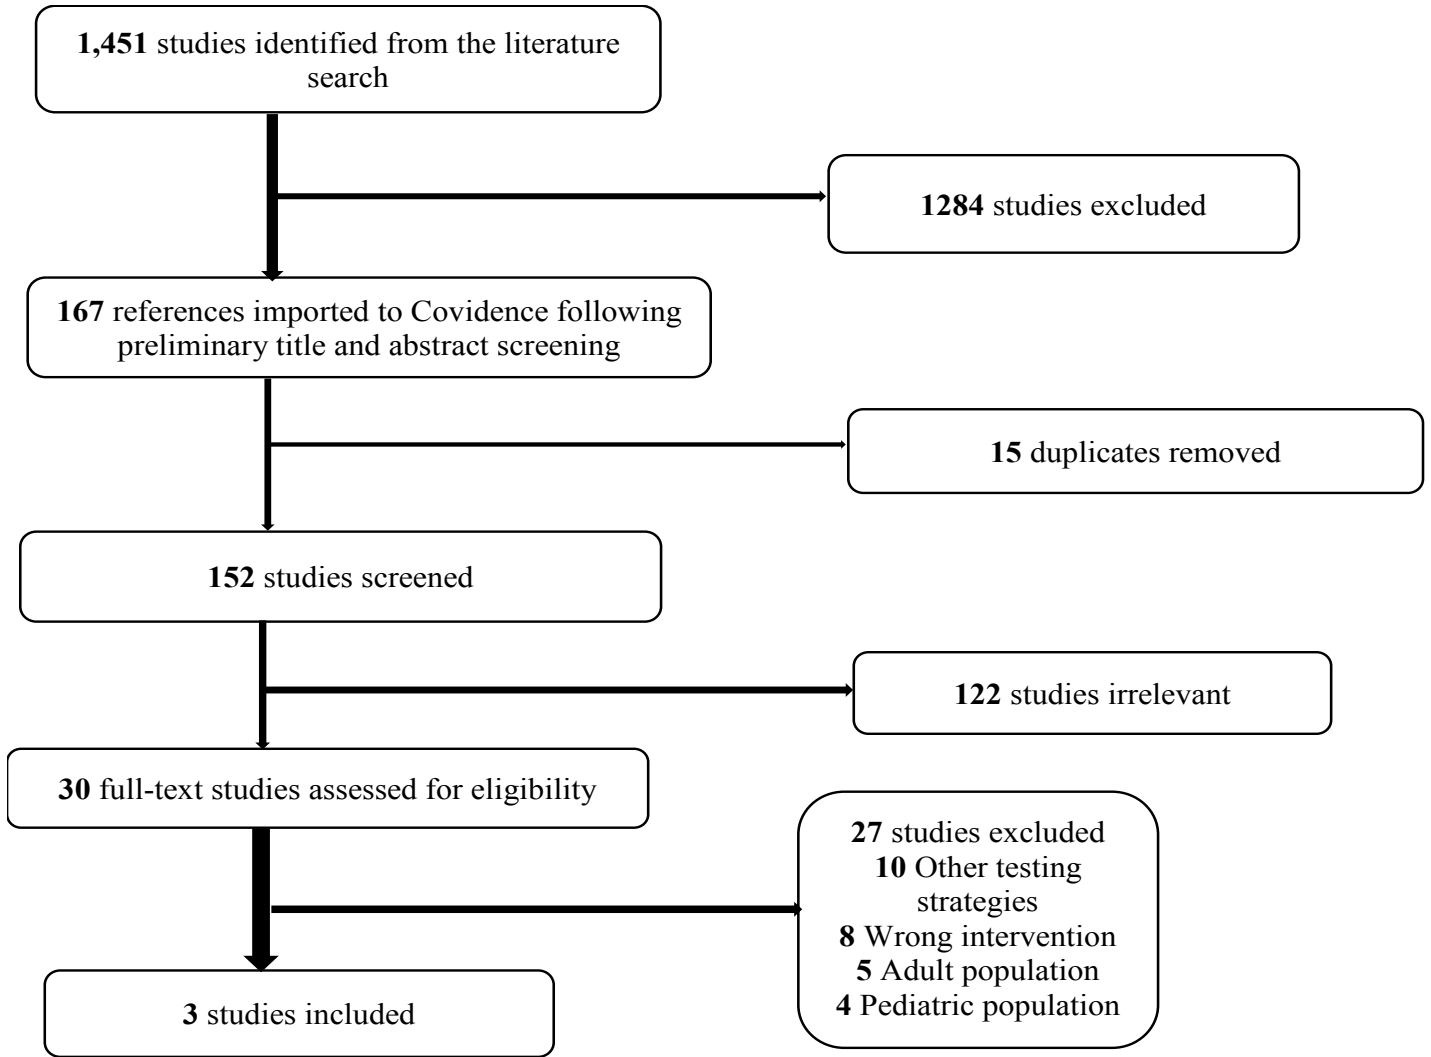

316

317

---

318 Figure 1; PRISMA Flow chart for the study selection (*adapted from the PRISMA*  
319 *diagram*) [25]

320

321

322

323

324

### 325 **Study Characteristics**

326

327 Following a full-text assessment, three studies were included in the  
328 review[20,34,35]. S3 tables represent the different characteristics of the  
329 included studies.

330

### 331 **Quality assessment**

332 The three included studies were assessed for quality before extracting the  
333 data. A summary of the CASP analysis for quality can be found in S1 Table.  
334 In this review, all included studies were evaluated to be of moderate  
335 quality

336 As seen in the S3 tables, these three studies were carried out as part of the  
337 implementation of HIV testing programs that took place between 2014 and  
338 2018. While two of the three studies had their data collected during  
339 implementation, one of them used programmatic data after the  
340 implementation process was completed [35]. Two of the three studies  
341 involved study participants between 0 and 24 years [20,35] while the other  
342 had study participants aged between 15 and 19 years old [34]. Only one of

343 the three studies disaggregated the 15-24 age group by gender with 40.6%  
344 (n=69) being male and 56.4% (n=93) females [20].

345 The total sample size for the three studies was 23,666 participants,  
346 however, the sample size of participants within the desired age group for  
347 this review (10 to 24 years) was 11,167 participants.

348

### 349 **Index testing implementation strategy**

350 The three studies included in the review implemented the index testing  
351 strategy with some differences in terms of recruitment and testing location  
352 for the contacts.

353

354 All three studies identified Index persons at the health facilities with  
355 follow-up of the contact persons done at different locations, however, one  
356 study also recruited index persons at mobile unit testing points as well as  
357 door-to-door testing [34]. Jubilee *et al.* carried out community testing of  
358 contact persons while Ahmed *et al.* and Tapera *et al.* gave options to the  
359 index persons to choose between facility and community or home testing. In  
360 addition, Tapera *et al.* also gave a third option of HIV self-testing to  
361 persons who didn't want any of the other options.

362

363 The age of consent in Jubilee *et al.* was 12 years while for Ahmed *et al.* was  
364 16 years. Community health workers were in charge of carrying out testing  
365 in two of the studies [20,35] while HIV testing and counselling (HTC)  
366 counsellors were in charge of testing in one [34]. See Table 7 for more on  
367 the index testing implementation process. While Ahmed *et al.* considered  
368 all household members of the index persons as contacts for testing, Tapera



---

369 *et al.* were more interested in households with members less than 25 years  
370 old and Jubilee *et al.* targeted mainly, sexual partners and biological  
371 children.

372

373

## 374 **Facilitators and barriers to Index testing**

375

376 S1 Table 3 summarises the facilitators, barriers, challenges and  
377 opportunities linked to the index testing strategy while Fig 2 illustrates the  
378 interconnection.

379

### 380 **Facilitators**

381

382 Tapera *et al.* had an overall index testing uptake of 85.17% with an uptake  
383 of 83.7% among participants aged between 15-24years old, which was far  
384 better than the national average of 50.4% of 15-24-year olds who knew their  
385 HIV status. The overall yield (both adults and young people) of testing was  
386 also high with 9.8% of all those tested individuals resulting in a positive HIV  
387 test result (1,193 positives out of 12,114 tested). The use of an adolescent  
388 peer-led model known as community adolescent treatment supporters  
389 (CATS), which involved training using a well-structured curriculum as well  
390 as on-the-job mentorship was found to be useful in achieving the high  
391 output in the program. This model was not only useful in the testing process  
392 but was also primordial in achieving great linkage and treatment outcomes  
393 [35].

394

---

395 Ahmed *et al.* also found a high uptake of index testing, with 93.5% of  
396 persons consenting to the strategy with a majority (88%) preferring home  
397 testing over facility testing. The yield among the 15-24year olds was 4.2% (7  
398 positives out of 165 tested). Home testing was therefore found to be  
399 instrumental in meeting young persons who may not be found around health  
400 facilities [20].

401  
402 As for Jubilee *et al.*, out of the 7,916 persons approached for index testing  
403 at their homes, 5,937 (75%) accepted with a final overall testing yield of  
404 4.2% (454 positives out of 10,854 contacts tested). In this study, the  
405 positivity rate among adolescents aged 15-19 was 2.4% per cent, however,  
406 the positivity was significantly higher among adolescents who were  
407 identified as sexual partners with a yield of 22.6% (7/31) unlike those who  
408 were biological children to the index persons with a yield of 1.8%  
409 (19/1,057). The study identified offering index testing to newly diagnosed  
410 HIV-positive individuals as a key factor in achieving high yields. After  
411 further analysis, the study also reported that persons tested using the index  
412 testing strategy were more likely to get linked to care than those tested  
413 through other strategies [34].

414

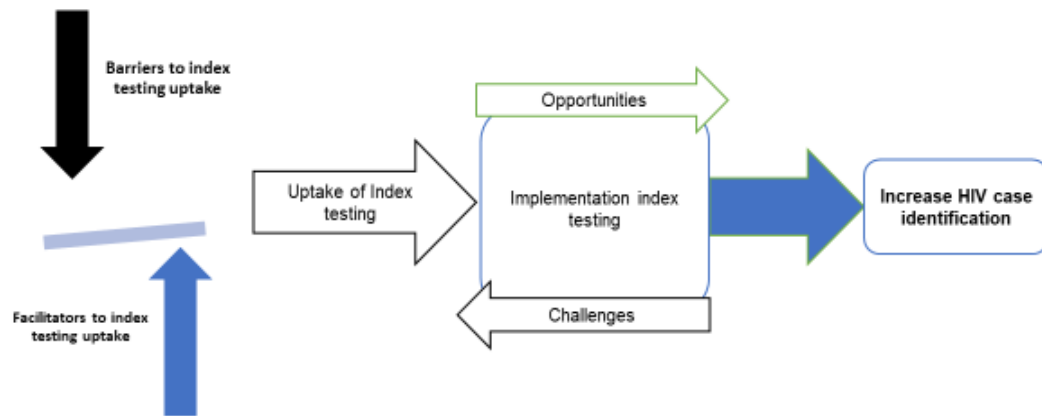

415

416 Figure 2; Connection between the factors associated with Index testing

417

418

419

420

421

### Barriers

422

423 Tapera *et al.* found very low testing uptake among lower age groups such as  
424 those below 9 years as compared to those between 20 and 24 years given  
425 that parents need to be available to provide consent for these participants  
426 to be tested [35]. The other two studies did not mention specific barriers in  
427 this case.

428

429

430

431  
432  
433  
434  
435  
436  
437  
438  
439  
440  
441  
442  
443  
444  
445  
446  
447  
448  
449  
450  
451  
452  
453  
454  
455  
456

## Challenges and opportunities with implementation of Index testing among adolescents and young people

### Challenges

A common challenge identified by Jubilee *et al.* and Ahmed *et al.* was that even though most participants preferred home testing to facility testing, there was difficulty in meeting participants at home during these scheduled home visits [20,34]. Tapera *et al.* also observed that even though the participants had an option for self-testing and home-based testing, the uptake was lower in their study. This finding was unlike that observed by Jubilee *et al.* who found home-based testing as a more acceptable testing option.

### 4.5.2 Opportunities

Fig 2 shows the relationship between the various factors affecting the uptake and outcome of the index testing implementation process. Jubilee *et al.* observed a higher positivity rate among first-time testers compared to re-testers who were offered index testing as well as a higher yield among contacts of newly diagnosed index persons compared to contact persons of index persons already on treatment [34]



458

## 5. Discussion

459

460

### Implementation of index testing among adolescents and young

461

### people in Africa

462

463

The three studies presented above describe the implementation of the index testing process among adolescents and young people in three SSA countries. The studies describe an implementation process that begins with the identification of index persons mostly in health facilities but also at HIV testing points such as mobile testing units and door-to-door testing. This was followed by seeking the consent of the index persons to test members of their households as well as sexual partners. This showed varying uptakes in the different studies ranging from 75% to 93.5%. This can be considered acceptable especially considering the 95-95-95 targets.

464

465

466

467

468

469

470

471

472

473

The authors highlight the importance of peer mentors and community health workers (CHWs) in the delivery of index testing. This adds to the growing evidence of the importance of CHWs in the different aspects of HIV programming [36-38]. This, therefore, may imply working with CHWs might be useful for achieving index testing among adolescents and young people given that they supplement the health workforce to carry out services even at the community level, meeting young people who may not visit health facilities.

474

475

476

477

478

479

480

481

Using peers to improve testing among adolescents and young people is also a recommended option for improving testing among this age group [39].

482

---

483 Even though a recommended approach to testing, many countries are yet to  
484 fully utilise peer mentors in their testing programs. Further research may be  
485 needed to further understand the use of using peer mentors and community  
486 health workers in the HIV testing process.

487  
488 The next step in the implementation was testing the contacts given by the  
489 index person. The index persons were offered the options of visiting their  
490 homes to test their family members or referring the contact persons to  
491 health facilities to be tested as well as taking the self-testing option. These  
492 options are in line with previous recommendations for alternate HIV testing  
493 service deliveries for adolescents and young people (ibid). Even though  
494 there were no specific tailored centres for adolescents and young people,  
495 Tapera *et al.* involved young peer mentors who carried out other treatment  
496 support as well as education activities geared towards adolescents and their  
497 caregivers. This could be an important lesson for other program  
498 implementers carrying out similar programs as adolescents and young  
499 people tend to trust their peers more, during testing [40].

500  
501 The implementation of the index testing among adolescents and young  
502 people reported in these studies had a slightly different approach to index  
503 testing among adults in the area of partner notification. Among adults, it  
504 often involves notification of contacts either by the index persons or the  
505 health care personnel. However, this, was not often the case as permission  
506 to come to test the household was taken from the index persons. This  
507 highlights another peculiarity with index testing among young persons which  
508 could be a limitation to getting adolescents and young people tested using  
509 this strategy.

510

511

512 **Barriers and facilitators of index testing among adolescents and**  
513 **young persons**

514

515 One of the main barriers identified in the studies was the legal age of  
516 consent for testing which affected uptake among adolescents below certain  
517 age groups. This finding corroborates previous studies identifying the legal  
518 age of consent to HIV testing as a barrier to HIV testing uptake among  
519 adolescents and young persons. This high legal age of consent for HIV  
520 testing implies that young persons will need parental permission to get  
521 tested which may dissuade them. Unfortunately, many countries in SSA have  
522 not considered this in their national testing guidelines [41,41]. The  
523 identified studies did not focus on identifying the barriers to uptake,  
524 however, other studies have identified barriers such as fear of stigma, fear  
525 of having positive results, limited access to HIV testing, and non-disclosure  
526 of HIV status by parents and partners [42-44]. This may have been reflected  
527 in the implementation given that not all contacts were home during the  
528 testing by the CWHs.

529

530 In the three studies, different strategies showed to help improve the uptake  
531 of the index testing process. These included the use of the adolescent peer-  
532 led model, providing differentiated service delivery, that is services  
533 targeting specific needs to different subgroups as well as offering several  
534 testing options including home testing. These strategies are similar to those  
535 proposed by other studies that identified education and addressing stigma



536 fears to be facilitators for HIV testing[45,46], testing adolescents at a  
537 location where they feel more comfortable could reduce the fears, thereby  
538 facilitating the uptake of HIV testing. Knowledge of these barriers and  
539 facilitators can be useful in better designing index testing programs for  
540 adolescents and young people that will be more accepted thereby  
541 increasing uptake of the strategy.

542

### 543 **Challenges and Opportunities of the index testing strategy**

544

545 Index testing as a strategy faces certain challenges but also has new  
546 opportunities as an HIV testing strategy. Even though contacts preferred  
547 home testing, the main difficulty is getting to meet them during visits by  
548 the CHWs. This included parents not being available to give consent for the  
549 testing of their children. This reduces the number of adolescents who can  
550 get tested at the community level and at times links the testing of  
551 adolescents to the willingness and availability of the parent which in some  
552 cases may lead to a missed diagnosis. Another identified challenge was the  
553 low uptake of HIV self-testing as a testing option during index testing [35].  
554 Even though not described in the study, a previous study identified a lack of  
555 status disclosure as a reason for the low uptake of self-testing during index  
556 testing [47]. Another challenge in the study was the fact that most  
557 adolescents were tested within a household testing context which may lead  
558 to coercion and deprive them of their autonomy as recommended by the  
559 WHO [43]. Other challenges like the risk of social harm like stigma, and  
560 discrimination resulting from testing were not considered in the studies  
561 within this review [43].

---

562 Even though faced with many implementation challenges, these studies all  
563 showed high positivity compared with other testing strategies like the door-  
564 to-door and fixed-point testing reported by Jubilee et al. (2019). This makes  
565 it a sure strategy to achieve epidemic control among the adolescent and  
566 youth populations. As such, program implementers can take these  
567 opportunities and challenges into account when designing index testing  
568 programs for adolescents and young people. This will reduce difficulties  
569 faced during implementation while capitalising on the opportunities.

570

## 571 **Strengths and limitations of the review**

572

### 573 **Strengths**

574

575 This review included studies with a significant sample size in three different  
576 countries within the SSA region. Secondly, this systematic review made use  
577 of evidence from routine programmatic implementation of the index testing  
578 strategy among adolescents which showed some realities on the field and  
579 not just in research. Therefore, this study presents findings that can be very  
580 helpful for programmatic implementation. In addition, it combines evidence  
581 from three different countries in SSA, making it an opportunity to gain a  
582 broader experience of the region other than a single country experience.

583

584

585

586  
587  
588  
589  
590  
591  
592  
593  
594  
595  
596  
597  
598  
599  
600  
601  
602  
603  
604  
605  
606  
607  
608  
609  
610  
611

---

## Limitations

The review had several limitations. The studies included were all carried out as part of a programmatic evaluation with one study retrospectively using program data. This limited the study type and may have been the source of bias. This is because most funded programs during implementation may follow certain donor specifications and guidelines which may introduce bias in the coverage and outcome indicators. In addition, all three studies focused on the implementation process and did not evaluate factors associated with certain outcomes. Also, the review of grey literature did not yield any additional studies to be included. Even though websites of certain national HIV programs were searched, only a few of them had their HIV guidelines included and among those who did, very little was mentioned concerning index testing among adolescents and young persons. The few documents identified from the grey literature did not meet the inclusion criteria.

## Public health implication

HIV infection is a public health crisis on a global scale, that affects different subpopulations in different ways and to successfully achieve epidemic control, there is a need to have a multilevel approach to addressing the pandemic. Index testing has been shown in this review and from previous studies to be effective in the identification of new HIV cases, both in the community and in the health facility. It presents itself as an innovative strategy in helping adolescents and young people know their status, an

---

612 important phase in helping those living with HIV to begin life-saving ART.  
613 Even though useful and effective in case identification, this review has  
614 highlighted some factors on which adolescents, caregivers, policymakers,  
615 and society can either capitalise on or improve to benefit from the testing  
616 strategy.

617  
618 Within communities in SSA, there is a need for more communication to  
619 improve the awareness of HIV testing among adolescents and young people.  
620 This includes disclosure of HIV status by parents, guardians and partners  
621 living with HIV, as well as communication at the community level to reduce  
622 the stigma around HIV testing in general within this age group. There is a  
623 need to create more adolescent and youth-friendly centres that can  
624 encourage persons within these age groups to test without being  
625 stigmatised.

626  
627 Index testing among adolescents and young people can benefit more from  
628 the use of peer mentors and community health workers to assist in the  
629 uptake and testing process. There is a need for countries within the SSA  
630 region to begin adopting policies to better make use of these CHWs in  
631 addressing the HIV pandemic in general as well as index testing among  
632 adolescents and young persons. One of the most important points to  
633 consider is to listen to the voices of adolescents and young people in every  
634 program concerning them. No one can decide what works best for  
635 adolescents and young people other than they do. This includes putting in  
636 place legislation that respects the rights of adolescents and young people,  
637 giving them the right to have access to HIV testing as well as the right to  
638 choose whether or not they want to get tested. Furthermore, the needs of

---

639 adolescent girls and young women are different from those of adolescent  
640 boys and young men. This implies that gender equality needs to be a major  
641 factor, giving both boys and girls an opportunity to have their voices heard.

642  
643 With the recent rise in recognition of the importance of CHWs in achieving  
644 health-related sustainable development goals [48], it is no doubt that  
645 making them part of the health system will significantly improve health  
646 outcomes. There is also a need to encourage countries to address laws  
647 targeting the age of consent to permit more adolescents to access HIV  
648 testing services as a whole and index testing in particular. Another  
649 important recommendation from this review is for national HIV programs to  
650 include sections focused on index testing among adolescents and also make  
651 available these guidelines public to ensure health providers get access to  
652 these documents to permit them fully implement.

653  
654 This review has identified that most index testing programs are mostly  
655 funded as part of routine HIV prevention, care and treatment programs  
656 from major donors. However, there is a need for these donors to not only  
657 fund routine programs but also implementation studies to better understand  
658 how strategies such as index testing can be more effective. These studies  
659 can better shed light on these strategies, helping policymakers at the  
660 country level to easily adopt and implement the strategy. More funding  
661 needs to go to researchers understanding and improving upon the strategy  
662 to achieve better yields and impact in HIV case identification among  
663 adolescents and young people. Globally, there is a need to increase the  
664 visibility of research work from the SSA region. Given that very few journals  
665 are existing within the region, encouraging the publication of research work

---

666 as well as lessons learned during implementation will increase publicly  
667 available data that can be used to share experiences.

668

### 669 **Critical assessment of the subject**

670

671 The paucity of data on index testing amongst adolescents and young people  
672 may be due to one of two reasons. Either, very few of the many programs  
673 find it important to publish the work they do or index testing among  
674 adolescents and young people is yet to be as developed as for adults. Even  
675 with a grey literature search, none of the identified studies met the  
676 inclusion criteria to be included among the reviewed studies. The websites  
677 of different national AIDS control programs in SSA were searched but very  
678 few had their national guidelines available online.

679 There is also a need to carry out more implementation science research  
680 studies to improve the quality of these programs to improve the practicality  
681 of the strategy. Also, funders may decide to make available extra funds for  
682 implementation research or make the publication of findings a part of the  
683 project deliverables to increase the number of publicly available data.

684

685  
686  
687  
688  
689  
690  
691  
692  
693  
694  
695  
696  
697  
698  
699  
700  
701  
702  
703  
704  
705  
706  
707  
708  
709

## 6. Conclusion

This review adds to the evidence that index testing could be a great strategy to achieve optimal HIV case identification among adolescents and young people. There are still challenges with addressing the legal age of consent among this age group, which affects the uptake and implementation of the strategy. Due to the limited research, there is a need for more research such as implementation science research to better understand the operational challenges of an index testing strategy among adolescents and young people as well as to understand better ways of implementing the strategy. For index testing to be optimal, it should not only focus on case identification but also pay attention to the needs and challenges faced by the adolescents and young people who are impacted by the strategy. The strategy needs to evolve to address the stigma faced by these persons and empower them to decide when to say “Yes” or “No” to testing. Addressing the barriers and challenges will make the strategies more acceptable, but understanding the needs of the adolescents and young people in SSA vis-à-vis index testing will make it successful in achieving epidemic control of HIV within the adolescent and youth subpopulations.

710

711

## Acknowledgements

712

We wish to acknowledge the immense and invaluable contribution of Dr

713

Zhong Eric Chen (Senior Researcher, Faculty of Sexual and Reproductive

714

Healthcare Clinical Effectiveness Unit, NHS Lothian, Scotland; Honorary

715

Fellow, University of Edinburgh) and Dr Magda Mekky (Teaching Fellow for

716

the online Master of Public Health Programme, University of Edinburg) in

717

supervising this work.

718

719

720

721

722

723

724

725

726

727

728

729

730

731

732

733



---

## References

- 734
- 735
- 736 [1] De Cock KM, Jaffe HW, Curran JW. Reflections on 40 Years of AIDS. *Emerg Infect Dis*  
737 2021;27:1553–60. <https://doi.org/10.3201/eid2706.210284>.
- 738 [2] Kharsany ABM, Karim QA. HIV Infection and AIDS in Sub-Saharan Africa: Current Status,  
739 Challenges and Opportunities. *The Open AIDS Journal* 2016;10:34.  
740 <https://doi.org/10.2174/1874613601610010034>.
- 741 [3] World Bank. Sub-Saharan Africa | Data 2020. <https://data.worldbank.org/country/ZG> (accessed  
742 September 16, 2022).
- 743 [4] Heath K, Levi J, Hill A. The Joint United Nations Programme on HIV/AIDS 95–95–95 targets:  
744 worldwide clinical and cost benefits of generic manufacture. *AIDS* 2021;35:S197.  
745 <https://doi.org/10.1097/QAD.0000000000002983>.
- 746 [5] Denison JA, Fonner VA, Kennedy CE, Sweat MD. HIV Counseling and Testing, Prevention of  
747 HIV. In: Hope TJ, Richman DD, Stevenson M, editors. *Encyclopedia of AIDS*, New York, NY:  
748 Springer; 2018, p. 705–13. [https://doi.org/10.1007/978-1-4939-7101-5\\_243](https://doi.org/10.1007/978-1-4939-7101-5_243).
- 749 [6] Mabaso M, Maseko G, Sewpaul R, Naidoo I, Jooste S, Takatshana S, et al. Trends and  
750 correlates of HIV prevalence among adolescents in South Africa: evidence from the 2008, 2012  
751 and 2017 South African National HIV Prevalence, Incidence and Behaviour surveys. *AIDS Res*  
752 *Ther* 2021;18:1–8. <https://doi.org/10.1186/s12981-021-00422-3>.
- 753 [7] USAID, UNAIDS, FHI. Young People Most at Risk of HIV: A Meeting Report and Discussion  
754 Paper from the Interagency Youth Working Group, U.S. Agency for International  
755 Development, the Joint United Nations Programme on HIV/AIDS (UNAIDS) Inter-Agency  
756 Task Team on HIV and Young People, and FHI 2010.

- 
- 757 [8] Slogrove AL, Sohn AH. The global epidemiology of adolescents living with HIV: Time for  
758 more granular data to improve adolescent health outcomes. *Current Opinion in HIV and AIDS*  
759 2018;13:170–8. <https://doi.org/10.1097/COH.0000000000000449>.
- 760 [9] HIV and AIDS in Adolescents. UNICEF DATA n.d.  
761 <https://data.unicef.org/topic/adolescents/hiv-aids/> (accessed October 7, 2019).
- 762 [10] Khalifa A, Stover J, Mahy M, Idele P, Porth T, Lwamba C. Demographic change and HIV  
763 epidemic projections to 2050 for adolescents and young people aged 15-24.  
764 <https://doi.org/10.1080/1654971620191662685> 2019;12.  
765 <https://doi.org/10.1080/16549716.2019.1662685>.
- 766 [11] Kurth AE, Lally MA, Choko AT, Inwani IW, Fortenberry JD. HIV testing and linkage to  
767 services for youth. *Journal of the International AIDS Society* 2015;18:19433.  
768 <https://doi.org/10.7448/IAS.18.2.19433>.
- 769 [12] Getaneh Y, Ayalew J, He Q, Tayachew A, Rashid A, Kassa D, et al. Universal HIV testing and  
770 the impact of late diagnosis on disease stage among adults in urban Ethiopia. *Tropical Medicine*  
771 *and Health* 2023;51:4. <https://doi.org/10.1186/s41182-023-00494-z>.
- 772 [13] Vasantharopan A, Maheswaran H, Simms V, Dziva Chikwari C, Chigwenah T, Chikodzore R,  
773 et al. A costing analysis of B-GAP: index-linked HIV testing for children and adolescents in  
774 Zimbabwe. *BMC Health Services Research* 2021;21:1–13. [https://doi.org/10.1186/S12913-021-](https://doi.org/10.1186/S12913-021-07070-3/TABLES/9)  
775 [07070-3/TABLES/9](https://doi.org/10.1186/S12913-021-07070-3/TABLES/9).
- 776 [14] Pettifor A, Stoner M, Pike C, Bekker L-G. Adolescent lives matter: preventing HIV in  
777 adolescents. *Current Opinion in HIV and AIDS* 2018;13:265.  
778 <https://doi.org/10.1097/COH.0000000000000453>.
- 779 [15] Jerene D, Abebe W, Taye K, Ruff A, Hallstrom I. Adolescents living with HIV are at higher  
780 risk of death and loss to follow up from care: Analysis of cohort data from eight health facilities  
781 in Ethiopia. *PLoS One* 2019;14:e0223655. <https://doi.org/10.1371/journal.pone.0223655>.

- 
- 782 [16] Chamie G, Napierala S, Agot K, Thirumurthy H. HIV testing approaches to reach the first  
783 UNAIDS 95% target in sub-Saharan Africa. *The Lancet HIV* 2021;8:e225–36.  
784 [https://doi.org/10.1016/S2352-3018\(21\)00023-0](https://doi.org/10.1016/S2352-3018(21)00023-0).
- 785 [17] (HTS\_Index) Number of individuals who were identified and tested using Index testing services  
786 and received their results | Indicator Registry n.d.  
787 [https://indicatorregistry.unaids.org/indicator/htsindex-number-individuals-who-were-identified-](https://indicatorregistry.unaids.org/indicator/htsindex-number-individuals-who-were-identified-and-tested-using-index-testing-services)  
788 [and-tested-using-index-testing-services](https://indicatorregistry.unaids.org/indicator/htsindex-number-individuals-who-were-identified-and-tested-using-index-testing-services) (accessed September 6, 2022).
- 789 [18] Brown LB, Miller WC, Kamanga G, Nyirenda N, Mmodzi P, Pettifor A, et al. HIV partner  
790 notification is effective and feasible in sub-Saharan Africa: Opportunities for HIV treatment  
791 and prevention. *Journal of Acquired Immune Deficiency Syndromes (1999)* 2011;56:437.  
792 <https://doi.org/10.1097/QAI.0B013E318202BF7D>.
- 793 [19] Henley C, Forgwei G, Welty T, Golden M, Adimora A, Shields R, et al. Scale-Up and Case-  
794 Finding Effectiveness of an HIV Partner Services Program in Cameroon: An Innovative HIV  
795 Prevention Intervention for Developing Countries. *Sexually Transmitted Diseases* 2013;40:909.  
796 <https://doi.org/10.1097/OLQ.0000000000000032>.
- 797 [20] Ahmed S, Sabelli RA, Simon K, Rosenberg NE, Kavuta E, Harawa M, et al. Index case finding  
798 facilitates identification and linkage to care of children and young persons living with  
799 HIV/AIDS in Malawi. *Tropical Medicine & International Health* 2017;22:1021–9.  
800 <https://doi.org/10.1111/tmi.12900>.
- 801 [21] Jubilee M, Park FJ, Chipango K, Pule K, Machinda A, Taruberekera N. HIV index testing to  
802 improve HIV positivity rate and linkage to care and treatment of sexual partners, adolescents  
803 and children of PLHIV in Lesotho. *PLoS One* 2019;14:e0212762.  
804 <https://doi.org/10.1371/journal.pone.0212762>.
- 805 [22] Emeh A, Usman SO, Adebajo AM, Ogboghodo E, Akinbinu B, Suraju A, et al. Positivity  
806 yield of HIV index testing services from selected healthcare facilities in Ondo State, southwest

- 
- 807 Nigeria. African Journal of Clinical and Experimental Microbiology 2021;22:97–102.
- 808 <https://doi.org/10.4314/ajcem.v22i1.13>.
- 809 [23] Chikwari CD, Dringus S, Ferrand RA. Barriers to, and emerging strategies for, HIV testing
- 810 among adolescents in sub-Saharan Africa. Current Opinion in HIV and AIDS 2018;13:257–64.
- 811 <https://doi.org/10.1097/COH.0000000000000452>.
- 812 [24] WHO. HIV SELF-TESTING AND PARTNER NOTIFICATION SUPPLEMENT TO
- 813 CONSOLIDATED GUIDELINES ON HIV TESTING SERVICES 2016.
- 814 [25] Page MJ, McKenzie JE, Bossuyt PM, Boutron I, Hoffmann TC, Mulrow CD, et al. The
- 815 PRISMA 2020 statement: an updated guideline for reporting systematic reviews. BMJ
- 816 2021;372:n71. <https://doi.org/10.1136/bmj.n71>.
- 817 [26] Cleo G, Scott AM, Islam F, Julien B, Beller E. Usability and acceptability of four systematic
- 818 review automation software packages: a mixed method design. Systematic Reviews
- 819 2019;8:145. <https://doi.org/10.1186/s13643-019-1069-6>.
- 820 [27] Miller SAB, Forrest JLR EdD. Enhancing your practice through evidence-based decision
- 821 making: PICO, learning how to ask good questions. Journal of Evidence-Based Dental Practice
- 822 2001;1.
- 823 [28] IRIS Home n.d. <https://apps.who.int/iris/> (accessed April 28, 2023).
- 824 [29] Abstract Archive n.d. <https://www.abstract-archive.org/> (accessed April 28, 2023).
- 825 [30] Wong SS-L, Wilczynski NL, Haynes RB. Comparison of top-performing search strategies for
- 826 detecting clinically sound treatment studies and systematic reviews in MEDLINE and
- 827 EMBASE. J Med Libr Assoc 2006;94:451–5.
- 828 [31] Bramer WM, Giustini D, Kleijnen J, Franco OH. Searching Embase and MEDLINE by using
- 829 only major descriptors or title and abstract fields: a prospective exploratory study. Systematic
- 830 Reviews 2018;7:200. <https://doi.org/10.1186/s13643-018-0864-9>.

- 
- 831 [32] CASP. Critical Appraisal Skills Programme. CASP - Critical Appraisal Skills Programme 2022.  
832 <https://casp-uk.net/casp-tools-checklists/> (accessed January 2, 2023).
- 833 [33] Long HA, French DP, Brooks JM. Optimising the value of the critical appraisal skills  
834 programme (CASP) tool for quality appraisal in qualitative evidence synthesis. *Research*  
835 *Methods in Medicine & Health Sciences* 2020;1:31–42.  
836 <https://doi.org/10.1177/2632084320947559>.
- 837 [34] Jubilee M, Park FJ, Chipango K, Pule K, Machinda A, Taruberekera N. HIV index testing to  
838 improve HIV positivity rate and linkage to care and treatment of sexual partners, adolescents  
839 and children of PLHIV in Lesotho. *PLoS ONE* 2019;14.  
840 <https://doi.org/10.1371/JOURNAL.PONE.0212762>.
- 841 [35] Tapera T, Willis N, Madzeke K, Napei T, Mawodzeke M, Chamoko S, et al. Effects of a Peer-  
842 Led Intervention on HIV Care Continuum Outcomes Among Contacts of Children,  
843 Adolescents, and Young Adults Living With HIV in Zimbabwe. *Global Health: Science and*  
844 *Practice* 2019;7:575–84. <https://doi.org/10.9745/GHSP-D-19-00210>.
- 845 [36] Hermann K, Van Damme W, Pariyo GW, Schouten E, Assefa Y, Cirera A, et al. Community  
846 health workers for ART in sub-Saharan Africa: learning from experience – capitalizing on new  
847 opportunities. *Human Resources for Health* 2009;7:31. <https://doi.org/10.1186/1478-4491-7-31>.
- 848 [37] Mwai GW, Mburu G, Torpey K, Frost P, Ford N, Seeley J. Role and outcomes of community  
849 health workers in HIV care in sub-Saharan Africa: a systematic review. *J Int AIDS Soc*  
850 2013;16:18586. <https://doi.org/10.7448/IAS.16.1.18586>.
- 851 [38] Busza J, Dauya E, Bandason T, Simms V, Chikwari CD, Makamba M, et al. The role of  
852 community health workers in improving HIV treatment outcomes in children: lessons learned  
853 from the ZENITH trial in Zimbabwe. *Health Policy and Planning* 2018;33:328–34.  
854 <https://doi.org/10.1093/heapol/czx187>.

- 
- 855 [39] WHO. HIV and Adolescents: Guidance for HIV Testing and Counselling and Care for  
856 Adolescents Living with HIV: Recommendations for a Public Health Approach and  
857 Considerations for Policy-Makers and Managers. RECOMMENDATIONS AND  
858 RATIONALES, World Health Organization; 2013.
- 859 [40] Kalibbala D, Mpungu SK, Ssuna B, Muzeyi W, Mberesero H, Semitala FC, et al. Determinants  
860 of testing for HIV among young people in Uganda. A nested, explanatory-sequential study.  
861 PLOS Global Public Health 2022;2:e0000870. <https://doi.org/10.1371/journal.pgph.0000870>.
- 862 [41] Barr-DiChiara M, Tembo M, Harrison L, Quinn C, Ameyan W, Sabin K, et al. Adolescents and  
863 age of consent to HIV testing: an updated review of national policies in sub-Saharan Africa.  
864 BMJ Open 2021;11:e049673. <https://doi.org/10.1136/bmjopen-2021-049673>.
- 865 [42] Dziva Chikwari C, Bernays S, Dringus S, Simms V, Weiss HA, Sibanda E, et al. Addressing  
866 the challenges and relational aspects of index-linked HIV testing for children and adolescents:  
867 insights from the B-GAP study in Zimbabwe. Implementation Science Communications  
868 2020;1:99. <https://doi.org/10.1186/s43058-020-00091-9>.
- 869 [43] Stangl AL, Sebany M, Kapungu C, Jessee C, Ricker CL, Chard E. Is HIV index testing and  
870 partner notification safe for adolescent girls and young women in low- and middle-income  
871 countries? J Int AIDS Soc 2020;23:e25562. <https://doi.org/10.1002/jia2.25562>.
- 872 [44] Onyemaechi PEN, Madubuike I, Okorie IE, Chimluru NL. Assessment of barriers to HIV  
873 Screening among adolescents in Girls Secondary School, Abayi, Aba. Journal of Medical  
874 Investigation and Practice 2022;12:6–13.
- 875 [45] Strauss M, Rhodes B, George G. A qualitative analysis of the barriers and facilitators of HIV  
876 counselling and testing perceived by adolescents in South Africa. BMC Health Services  
877 Research 2015;15:250. <https://doi.org/10.1186/s12913-015-0922-0>.
- 878 [46] Diress G, Ahmed M, Adane S, Linger M, Alemnew B. Barriers and Facilitators for HIV Testing  
879 Practice Among Ethiopian Women Aged 15-24 years: Analysis of the 2016 Ethiopian

- 
- 880 Demographic and Health Survey. HIV AIDS (Auckl) 2020;12:963–70.  
881 <https://doi.org/10.2147/HIV.S280590>.
- 882 [47] Boye S, Bouaré S, Ky-Zerbo O, Rouveau N, Simo Fotso A, d’Elbée M, et al. Challenges of  
883 HIV Self-Test Distribution for Index Testing When HIV Status Disclosure Is Low: Preliminary  
884 Results of a Qualitative Study in Bamako (Mali) as Part of the ATLAS Project. Front Public  
885 Health 2021;9:653543. <https://doi.org/10.3389/fpubh.2021.653543>.
- 886 [48] Perry HB, Chowdhury M, Were M, LeBan K, Crigler L, Lewin S, et al. Community health  
887 workers at the dawn of a new era: 11. CHWs leading the way to “Health for All.” Health  
888 Research Policy and Systems 2021;19:111. <https://doi.org/10.1186/s12961-021-00755-5>.

889

890

## 891 Supporting information

892

893 S1 File Search strings

894 S2 File Quality Assessment of included studies

895 S3 Study Characteristics

896

897

898
